# Supplementary material for: Crystal structure and electronic structure calculations of a novel organic triphosphate complex: excellent electrochemical properties with ultra-efficient lithium storage capacity
Source: Royal Society of Chemistry journal article supplement (doi:10.1039/d4nj00461b), 2024-01-01
Supplement: d4nj00461b1.pdf [file d4nj00461b1.pdf]

**Table S1:** Crystallographic data and structure refinement

| <b>Crystallographic results</b>                                                   |                                                                                          |
|-----------------------------------------------------------------------------------|------------------------------------------------------------------------------------------|
| Chemical Formula :                                                                | HO <sub>10</sub> P <sub>3</sub> ·4(C <sub>6</sub> H <sub>14</sub> N)·2(H <sub>2</sub> O) |
| Mr (g.mol <sup>-1</sup> )                                                         | 690.67                                                                                   |
| Crystal System :                                                                  | Triclinic                                                                                |
| Space -Group :                                                                    | $P\bar{1}$                                                                               |
| Unit parameter                                                                    |                                                                                          |
| a(Å)                                                                              | 9.7371 (2)                                                                               |
| b(Å)                                                                              | 12.1048 (2)                                                                              |
| c(Å)                                                                              | 15.7768 (3)                                                                              |
| $\alpha$ (°)                                                                      | 71.092 (2)                                                                               |
| $\beta$ (°)                                                                       | 83.131 (1)                                                                               |
| $\gamma$ (°)                                                                      | 87.290 (1)                                                                               |
| V(Å <sup>3</sup> )                                                                | 1746.50 (6)                                                                              |
| Z                                                                                 | 2                                                                                        |
| F (000)                                                                           | 748                                                                                      |
| Absorption coefficient $\mu$ (mm <sup>-1</sup> )                                  | 2.08                                                                                     |
| Density (mg.m <sup>-3</sup> )                                                     | 1.313                                                                                    |
| Cristal form                                                                      | Block                                                                                    |
| Cristal color                                                                     | colourless                                                                               |
| Dimension (mm <sup>3</sup> )                                                      | 0.27 × 0.07 × 0.05                                                                       |
| <b>Registration conditions</b>                                                    |                                                                                          |
| Diffractometer                                                                    | Bruker-Nonuis Kappa CCD                                                                  |
| Temperature (K)                                                                   | 120                                                                                      |
| Wave length MoK $\alpha$ (Å)                                                      | 0.71073                                                                                  |
| $\Theta$ max ; $\Theta$ min (°)                                                   | 79.1 ; 3.0                                                                               |
| Tmin ; Tmax                                                                       | 0.614 ; 0.911                                                                            |
| Calculated reflections                                                            | 72331                                                                                    |
| Independent reflections                                                           | 7303                                                                                     |
| Observed reflection [ $I > 2\sigma$ ]                                             | 6733                                                                                     |
| h                                                                                 | -12 → 12                                                                                 |
| k                                                                                 | -15 → 15                                                                                 |
| l                                                                                 | -20 → 19                                                                                 |
| <b>Refinement Parameters</b>                                                      |                                                                                          |
| Method directs:                                                                   | SHELX                                                                                    |
| Used programs:                                                                    | WinGx                                                                                    |
| R <sub>int</sub>                                                                  | 0.050                                                                                    |
| R [ $F^2 > 2\sigma(F^2)$ ]                                                        | 0.033                                                                                    |
| wR(F <sup>2</sup> )                                                               | 0.089                                                                                    |
| Goof S                                                                            | 1.07                                                                                     |
| $\delta$ max ; $\delta$ min (e Å <sup>-3</sup> )                                  | 0.59 ; -0.44                                                                             |
| With $w = 1/[\sigma^2(Fo^2) + (0.0215P)^2 + 1.7725P]$ et $P = (Fo^2 + 2Fc^2) / 3$ |                                                                                          |

**Table S2.** Selected geometric parameters for  $\text{HO}_{10}\text{P}_3 \cdot (\text{C}_6\text{H}_{14}\text{N})_4 \cdot 2(\text{H}_2\text{O})$  (Å, °).

| Geometric Parameters |             |                 |            |
|----------------------|-------------|-----------------|------------|
| Bond lengths (Å)     |             | Bond angles (°) |            |
| P1—O3                | 1.5121 (10) | O3—P1—O1        | 113.01 (6) |
| P1—O2                | 1.5166 (9)  | O3—P1—O2        | 114.19 (6) |
| P2—O5                | 1.4801 (10) | O1—P1—O2        | 114.04 (5) |
| P2—O4                | 1.5875 (10) | O5—P2—O6        | 117.01 (6) |
| P3—O8                | 1.4912 (10) | O5—P2—O4        | 112.62 (6) |
| P3—O10               | 1.4970 (10) | O8—P3—O9        | 107.08 (6) |
| C5B—C6B              | 1.529 (2)   | O10—P3—O9       | 111.52 (6) |
| N1C—C1C              | 1.4895 (19) | C1A—N1A—H1G     | 110.6 (11) |
| C1C—C6C              | 1.512 (2)   | C1A—N1A—H1H     | 109.3 (12) |
| C1C—C2C              | 1.527 (2)   | N1A—C1A—H1A     | 108.4      |
| C2C—C3C              | 1.536 (2)   | C6A—C1A—H1A     | 108.4      |

**Table S3.** the conductivity value of  $\text{HO}_{10}\text{P}_3 \cdot (\text{C}_6\text{H}_{14}\text{N})_4 \cdot 2(\text{H}_2\text{O})$  system:

| Température (K) | DC Conductivity (S/Cm <sup>-1</sup> ) |
|-----------------|---------------------------------------|
| 393             | 4.88241 10 <sup>-10</sup>             |
| 403             | 9.25088 10 <sup>-10</sup>             |
| 413             | 1.71759 10 <sup>-09</sup>             |
| 423             | 3.82101 10 <sup>-09</sup>             |
| 428             | 1.08946 10 <sup>-08</sup>             |
| 433             | 4.05615 10 <sup>-08</sup>             |
| 438             | 1.73454 10 <sup>-07</sup>             |
| 443             | 5.273 10 <sup>-07</sup>               |

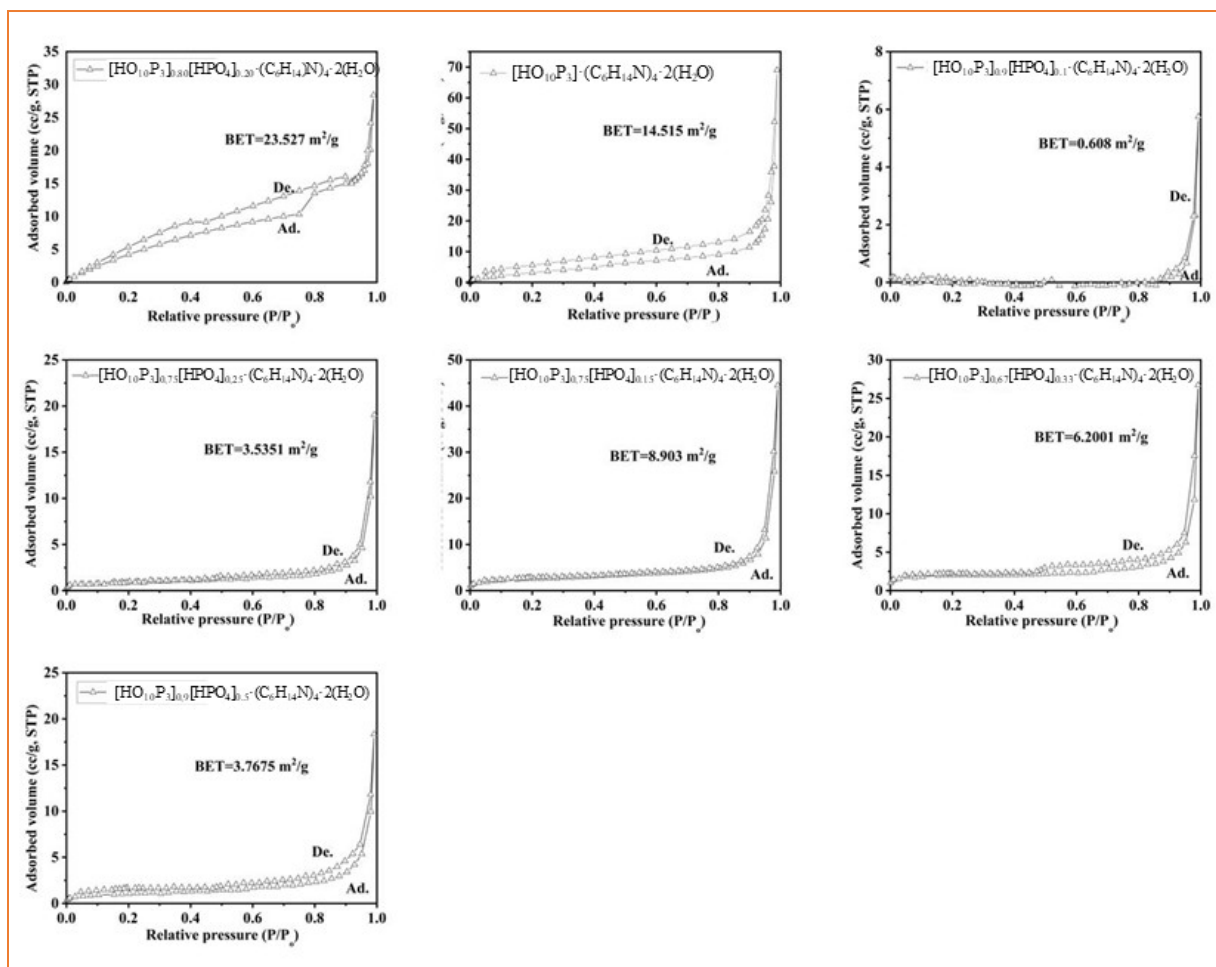

**Fig. S1:** Nitrogen adsorption-desorption isotherm curves of all the samples.

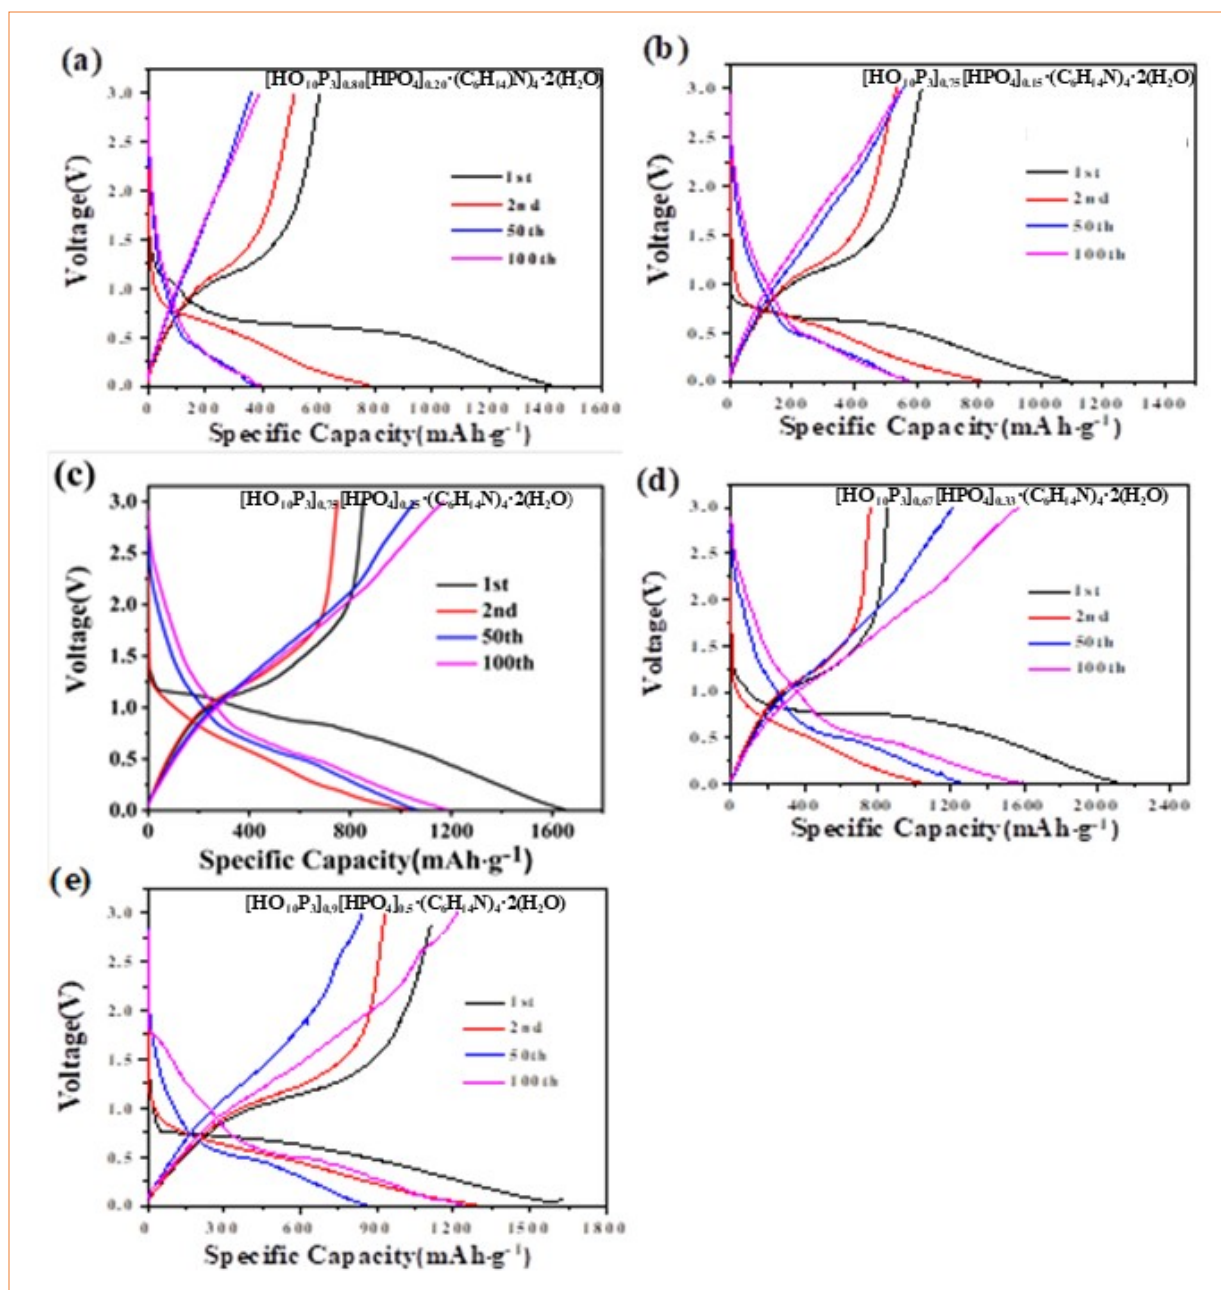

**Figure S2.** Charge-discharge profiles vs. specific capacity at  $100 \text{ mA}\cdot\text{g}^{-1}$  of (a)  $[\text{HO}_{10}\text{P}_3]_{0.9}[\text{HPO}_4]_{0.1}\cdot(\text{C}_6\text{H}_{14}\text{N})_4\cdot 2(\text{H}_2\text{O})$ , (b)  $[\text{HO}_{10}\text{P}_3]_{0.80}[\text{HPO}_4]_{0.2}\cdot(\text{C}_6\text{H}_{14}\text{N})_4\cdot 2(\text{H}_2\text{O})$ , (c)  $[\text{HO}_{10}\text{P}_3]_{0.75}[\text{HPO}_4]_{0.25}\cdot(\text{C}_6\text{H}_{14}\text{N})_4\cdot 2(\text{H}_2\text{O})$ , (d)  $[\text{HO}_{10}\text{P}_3]_{0.67}[\text{HPO}_4]_{0.33}\cdot(\text{C}_6\text{H}_{14}\text{N})_4\cdot 2(\text{H}_2\text{O})$ , (e)  $[\text{HO}_{10}\text{P}_3]_{0.5}[\text{HPO}_4]_{0.5}\cdot(\text{C}_6\text{H}_{14}\text{N})_4\cdot 2(\text{H}_2\text{O})$ .
